# Supplementary material for: Structures, electronic properties, and superconductivities of alkaline-earth metal-doped phenanthrene and charge transfer characteristics of metal-doped phenanthrene
Source: Royal Society of Chemistry journal article supplement (doi:10.1039/d0cp04020g), 2020-01-01
Supplement: d0cp04020g1.pdf [file d0cp04020g1.pdf]

## Supplementary Information

### Structures, electronic properties, and superconductivity of alkaline-earth metal doped phenanthrene and charge transfer characteristics in metal doped phenanthrene

Lei Gao,<sup>a</sup> Guo-Hua Zhong,<sup>\*bc</sup> and Hai-Qing Lin<sup>\*a</sup>

<sup>a</sup> Beijing Computational Science Research Center, Beijing, 100193, China

<sup>b</sup> Shenzhen Institutes of Advanced Technology, Chinese Academy of Sciences, Shenzhen, P. R. China.

<sup>c</sup> University of Chinese Academy of Sciences, Beijing 100049, China

E-mail: gh.zhong@siat.ac.cn; zh.lu1@siat.ac.cn; cl.yang@siat.ac.cn

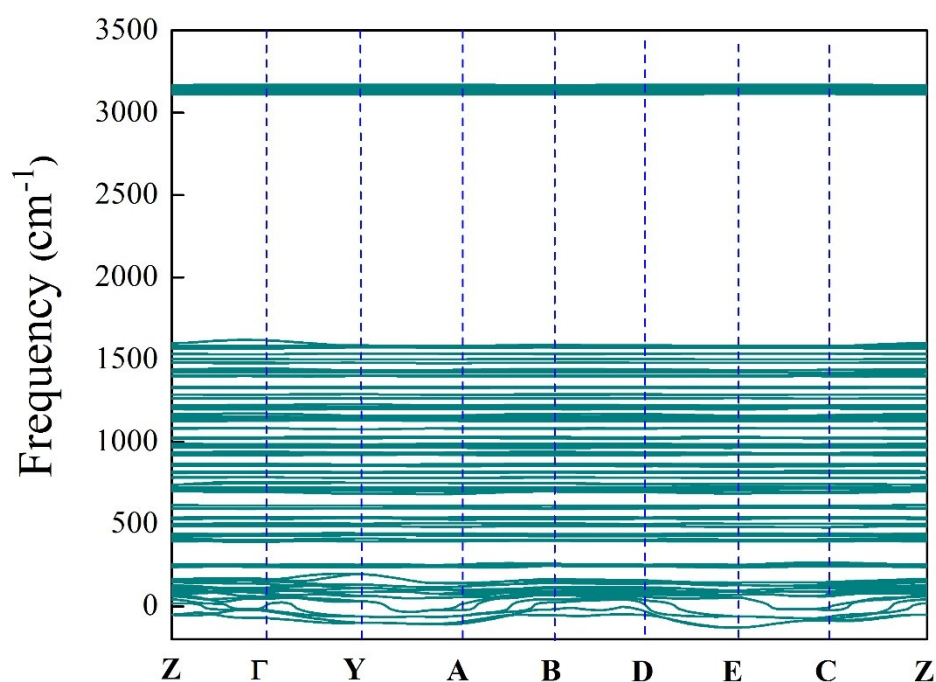

**Fig. S1** Calculated phonon spectrum along high-symmetrical k-point paths of pure phenanthrene.
